# Supplementary material
Source: publisher site journal article supplement (https://www.dovepress.com/article/567157)
Supplement: Supplementary file 1 [file 567157%20Revised%20Supplementary%20material.docx]

**Supplementary material**

**Supplementary Table 1** Feature Encoding and Definitions

| Feature | Encoding | Definition / Measurement |
| --- | --- | --- |
| Age | — | Actual age in years at the time of admission |
| Gender | 1 = Male; 2 = Female | Biological sex at birth |
| Education Level | 1 = Primary school or below; 2 = Junior high school; 3 = Senior high school or above | The highest level of formal education attained |
| Smoking History | 0 = No; 1 = Yes | Current tobacco use at the time of admission |
| Drinking History | 0 = No; 1 = Yes | Current alcohol consumption at the time of admission |
| BMI | — | Body Mass Index, calculated from height and weight measured at admission (BMI = weight [kg] / height [m]²) |
| Number of Comorbidities | 0 = 0; 1 = 1; 2 = 2; 3 = ≥3 | Number of chronic diseases already had by the patient before admission. |
| Hypertension | 0 = No; 1 = Yes | Physician-diagnosed hypertension prior to admission |
| Diabetes | 0 = No; 1 = Yes | Physician-diagnosed diabetes mellitus prior to admission |
| Hyperlipidemia | 0 = No; 1 = Yes | Physician-diagnosed hyperlipidemia prior to admission |
| Coronary Heart Disease | 0 = No; 1 = Yes | Physician-diagnosed coronary heart disease prior to admission |
| Atrial Fibrillation | 0 = No; 1 = Yes | Physician-diagnosed atrial fibrillation prior to admission |
| History of Stroke | 0 = No; 1 = Yes | Physician-diagnosed history of stroke (ischemic or hemorrhagic) prior to the current admission |
| ADL Grade | 1 = Independence (BI=100); 2 = Mild Dependence (BI=61-99); 3 = Moderate Dependence (BI=41-60); 4 = Severe Dependence (BI≤40) | Level of dependence in Activities of Daily Living, assessed at admission using the Barthel Index (BI) |
| Hypoalbuminemia | 0 = No; 1 = Yes | Laboratory result at admission: serum total protein < 60 g/L and/or serum albumin < 30 g/L |
| NIHSS Score | — | National Institutes of Health Stroke Scale score, assessed at admission. Scores range from 0 to 42, with higher scores indicating more severe neurological impairment. |
| pre-mRS Grade | 1 = 0-2(Favorable Outcome); 2 = 3-5(Poor Outcome) | Pre-stroke modified Rankin Scale score, assessing functional status prior to the current stroke event. |
| Lesion Hemisphere | 1 = Left; 2 = Right; 3 = Bilateral | The cerebral hemisphere(s) affected by the acute ischemic lesion, as determined by CT imaging. |
| Multifocal Lesions | 0 = No; 1 = Yes | Presence of two or more distinct acute ischemic lesions, as identified on DWI and/or MRA sequences. |
| Treatment Methods | 1 = Conservative Treatment; 2 =Thrombolysis/Thrombectomy | Primary treatment strategy determined by neurologists based on individual patient condition and clinical guidelines. |

**Abbreviations：**BI, Barthel Index; NIHSS, National Institutes of Health Stroke Scale; pre-mRS, pre-stroke modified Rankin Scale; DWI, Diffusion-Weighted Imaging; MRA, Magnetic Resonance Angiography.

**
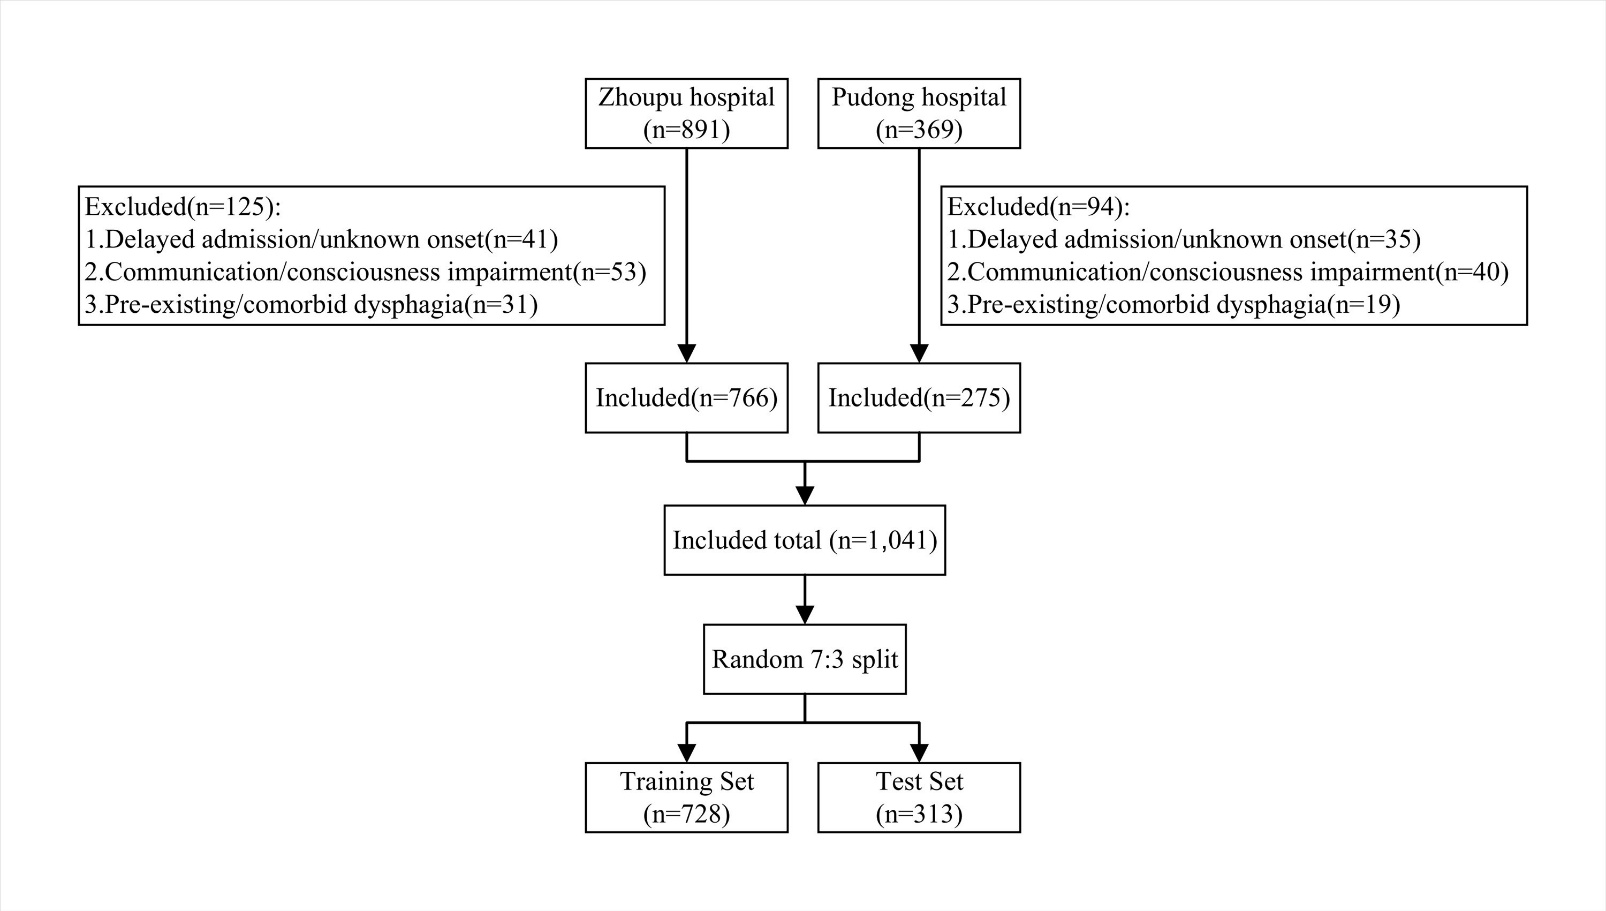
**

**Supplementary Figure 1** Participant recruitment flowchart

**Supplementary Table 2** FOIS scores of 305 patients with dysphagia

| FOIS score | Description | n(%) |
| --- | --- | --- |
| 1 | Nothing by mouth | 111(36.4) |
| 2 | Tube dependent with minimal oral intake | 77(25.2) |
| 3 | Tube dependent with consistent oral intake | 69(22.6) |
| 4 | Total oral diet of a single consistency | 39(12.8) |
| 5 | Total oral diet with multiple consistencies, but requiring special preparation | 3(1.0) |
| 6 | Total oral diet with multiple consistencies without special preparation, but with specific food limitations | 6(2.0) |
| 7 | Total oral diet with no restrictions | 0(0.0) |

**Abbreviations：**FOIS, Functional Oral Intake Scale; PSD, Post-stroke dysphagia.

**Supplementary Table 3** Comparison of Characteristics Between Training and Test Sets

| Characteristic | Training Set (n=728) | Test Set (n=313) | *Z/χ2* | *P-value* |
| --- | --- | --- | --- | --- |
| Dysphagia, n (%) |  |  | 0.037 | 0.848 |
| No | 516(70.9) | 220(70.3) |  |  |
| Yes | 212(29.1) | 93(29.7) |  |  |
| Age(years) | 70（63,78） | 70(61,77) | -0.785 | 0.433 |
| Gender, n (%) |  |  | 0.144 | 0.704 |
| Male | 451(62.0) | 190(60.7) |  |  |
| Female | 277(38.0) | 123(39.3) |  |  |
| Education Level, n (%) |  |  | 0.669 | 0.716 |
| Primary School or Below | 340(46.7) | 138(44.1) |  |  |
| Junior High School | 279(38.3) | 124(39.6) |  |  |
| Senior High School or Above | 109(15.0) | 51(16.3) |  |  |
| Smoking, n (%) |  |  | 0.059 | 0.808 |
| No | 579(79.5) | 251(80.2) |  |  |
| Yes | 149(20.5) | 62(19.8) |  |  |
| Drinking, n(%) |  |  | 0.021 | 0.885 |
| No | 658(90.4) | 282(90.1) |  |  |
| Yes | 70(9.6) | 31(9.9) |  |  |
| BMI, Kg/m2 | 24.34(22.22,26.57) | 24.34(22.31,26.57) | -0.468 | 0.640 |
| Number of Chronic Conditions, n (%) |  |  | 4.942 | 0.176 |
| 0 | 110(15.1) | 52(16.6) |  |  |
| 1 | 279(38.3) | 99(31.6) |  |  |
| 2 | 224(30.8) | 101(32.3) |  |  |
| ≥3 | 115(15.8) | 61(19.5) |  |  |
| Hypertension, n(%) |  |  | 0.238 | 0.625 |
| No | 194(26.6) | 88(28.1) |  |  |
| Yes | 534(73.4) | 225(71.9) |  |  |
| Diabetes, n(%) |  |  | 0.914 | 0.339 |
| No | 492(67.6) | 202(64.5) |  |  |
| Yes | 236(32.4) | 111(35.5) |  |  |
| Hyperlipidemia, n(%) |  |  | 2.475 | 0.116 |
| No | 709(97.4) | 299(95.5) |  |  |
| Yes | 19(2.6) | 14(4.5) |  |  |
| Coronary Heart Disease, n(%) |  |  | 1.230 | 0.267 |
| No | 650(89.3) | 272(86.9) |  |  |
| Yes | 78(10.7) | 41(13.1) |  |  |
| Atrial Fibrillation, n(%) |  |  | 0.481 | 0.488 |
| No | 702(96.4) | 299(95.5) |  |  |
| Yes | 26(3.6) | 14(4.5) |  |  |
| History of Stroke, n(%) |  |  | 0.433 | 0.511 |
| No | 549(75.4) | 230(73.5) |  |  |
| Yes | 179(24.6) | 83(26.5) |  |  |
| ADL Grade, n (%) |  |  | 0.764 | 0.858 |
| Independence | 152(20.9) | 65(20.8) |  |  |
| Mild Dependence | 183(25.1) | 85(27.2) |  |  |
| Moderate Dependence | 236(32.4) | 94(30.0) |  |  |
| Severe Dependence | 157(21.6) | 69(22.0) |  |  |
| Hypoalbuminemia, n(%) |  |  | 0.327 | 0.568 |
| No | 635(87.2) | 277(88.5) |  |  |
| Yes | 93(12.8) | 36(11.5) |  |  |
| NIHSS Score | 2(0,6) | 2(0,7) | -1.000 | 0.317 |
| mRS Grade, n (%) |  |  | 0.329 | 0.566 |
| 0-2 | 421(57.8) | 175(55.9) |  |  |
| 3-5 | 307(42.2) | 138(44.1) |  |  |
| Lesion Hemisphere, n(%) |  |  | 2.347 | 0.309 |
| Left | 376(51.6) | 146(46.6) |  |  |
| Right | 330(45.3) | 158(50.5) |  |  |
| Bilateral | 22(3.0) | 9(2.9) |  |  |
| Multifocal Lesions, n(%) |  |  | 4.983 | **0.026** |
| No | 540(74.2) | 211(67.4) |  |  |
| Yes | 188(25.8) | 102(32.6) |  |  |
| Treatment Methods, n (%) |  |  | 0.182 | 0.670 |
| Conservative Treatment | 662(90.9) | 282(90.1) |  |  |
| Thrombolysis/Thrombectomy | 66(9.1) | 31(9.9) |  |  |

**Note：**Continuous values were presented as median (IQR). Categorical values were presented as n (%).Bold implies that the p-value is statistically significant.

**Abbreviations：**BMI, Body Mass Index；ADL, Activities of Daily Living；NIHSS, National Institutes of Health Stroke Scale；mRS, Modified Rankin Scale.

**Supplementary Table 4** Spearman Correlation Analysis of the Features

|  | Coronary heart disease | ADL grade | Hypoalbuminemia | NIHSS score | Lesion hemisphere | Multifocal Lesions |
| --- | --- | --- | --- | --- | --- | --- |
| Coronary heart disease | 1.000 | 0.101** | 0.057 | 0.046 | 0.017 | 0.120** |
| ADL grade | 0.101** | 1.000 | 0.335** | 0.589** | 0.141** | 0.490** |
| Hypoalbuminemia | 0.101 | 0.335** | 1.000 | 0.333** | 0.109** | 0.267** |
| NIHSS score | 0.057 | 0.589** | 0.333** | 1.000 | 0.110** | 0.511** |
| Lesion hemisphere | 0.017 | 0.141** | 0.109** | 0.110** | 1.000 | 0.132** |
| Multifocal Lesions | 0.120** | 0.490** | 0.267** | 0.511** | 0.132** | 1.000 |

**Note:** **,p < 0.01 (two-tailed tests).

**Abbreviations：**ADL, Activities of Daily Living；NIHSS, National Institutes of Health Stroke Scale.

**Supplementary Table 5** Variance Inflation Factor Analysis of the Features

| Features | Tolerance | VIF |
| --- | --- | --- |
| Coronary heart disease | 0.982 | 1.018 |
| ADL grade | 0.630 | 1.588 |
| Hypoalbuminemia | 0.851 | 1.176 |
| NIHSS score | 0.640 | 1.562 |
| Lesion hemisphere | 0.955 | 1.047 |
| Multifocal lesions | 0.688 | 1.455 |

**Abbreviations：**VIF, variance inflation factor ;ADL, Activities of Daily Living ;NIHSS, National Institutes of Health Stroke Scale.

**Supplementary Table 6** DeLong’s Test for Pairwise Comparison of ROC Curves

| Dataset | Model1 | Model2 | AUC1 | AUC2 | *p*-value |
| --- | --- | --- | --- | --- | --- |
| Train set | RF | SVM | 0.959 | 0.942 | 0.188 |
|  | RF | LR | 0.959 | 0.949 | 0.362 |
|  | RF | KNN | 0.959 | 0.953 | 0.554 |
|  | RF | Lasso | 0.959 | 0.951 | 0.454 |
|  | RF | ANN | 0.959 | 0.944 | 0.180 |
|  | SVM | LR | 0.942 | 0.949 | 0.622 |
|  | SVM | KNN | 0.942 | 0.953 | 0.436 |
|  | SVM | Lasso | 0.942 | 0.951 | 0.512 |
|  | SVM | ANN | 0.942 | 0.944 | 0.886 |
|  | LR | KNN | 0.949 | 0.953 | 0.754 |
|  | LR | Lasso | 0.949 | 0.951 | 0.863 |
|  | LR | ANN | 0.949 | 0.944 | 0.693 |
|  | KNN | Lasso | 0.953 | 0.951 | 0.885 |
|  | KNN | ANN | 0.953 | 0.944 | 0.473 |
|  | Lasso | ANN | 0.951 | 0.944 | 0.564 |
| Test set | RF | SVM | 0.952 | 0.946 | 0.522 |
|  | RF | LR | 0.952 | 0.950 | 0.850 |
|  | RF | KNN | 0.952 | 0.958 | 0.397 |
|  | RF | Lasso | 0.952 | 0.950 | 0.857 |
|  | RF | ANN | 0.952 | 0.962 | 0.110 |
|  | SVM | LR | 0.946 | 0.950 | 0.308 |
|  | SVM | KNN | 0.946 | 0.958 | 0.295 |
|  | SVM | Lasso | 0.946 | 0.950 | 0.290 |
|  | SVM | ANN | 0.946 | 0.962 | **0.020** |
|  | LR | KNN | 0.950 | 0.958 | 0.434 |
|  | LR | Lasso | 0.950 | 0.950 | 0.887 |
|  | LR | ANN | 0.950 | 0.962 | **0.036** |
|  | KNN | Lasso | 0.958 | 0.950 | 0.439 |
|  | KNN | ANN | 0.958 | 0.962 | 0.602 |
|  | Lasso | ANN | 0.950 | 0.962 | **0.037** |

**Note:**Bold implies that the p-value is statistically significant.

**Abbreviations：**AUC, Area Under the Curve. RF, Random Forest；SVM，Support Vector Machine；LR, Logistic Regression；KNN, K-Nearest Neighbors；Lasso, Least Absolute Shrinkage and Selection Operator；ANN, Artificial Neural Network.

**Supplementary Table 7** Hyperparameter settings for six models

| Model | Parameter | Tuning scope | Optimal hyperparameter |
| --- | --- | --- | --- |
| RF | mtry | （2, 4, 6, 8, 10） | 2 |
| SVM | sigma | （0.01, 0.1, 1） | 0.1 |
| C | (0.25, 0.5, 1, 2) | 0.5 |
| LR | none | none | none |
| KNN | k | （3, 5, 7, 9, 11, 13, 15） | 7 |
| Lasso | alpha | （0, 0.5, 1） | 0.5 |
| lambda | （0.001, 0.01, 0.1, 1） | 0.001 |
| ANN | size | （3, 5, 7） | 7 |
|  | decay | （0, 0.001, 0.01） | 0.01 |

**Abbreviations：**RF, Random Forest；SVM，Support Vector Machine；LR, Logistic Regression；KNN, K-Nearest Neighbors；Lasso, Least Absolute Shrinkage and Selection Operator；ANN, Artificial Neural Network.
